# Supplementary material for: AGORA: organellar genome annotation from the amino acid and nucleotide references
Source: Oxford University Press journal article supplement (doi:10.1093/bioinformatics/bty196), 2018-03-28
Supplement: bioinformatics_34_15_2661_s1.pdf [file bioinformatics_34_15_2661_s1.pdf]

## [SUPPLEMENTARY]

# AGORA : Organellar genome annotation from the amino acid and nucleotide references

Jaehee Jung<sup>1</sup>, Jong Im Kim<sup>2</sup>, Young-Sik Jeong<sup>3</sup>, and Gangman Yi<sup>\*3</sup>

<sup>1</sup>Department of General Education, Hongik University, Seoul, Korea

<sup>2</sup>Department of Biology, Chungnam National University, Daejeon, Korea

<sup>3</sup>Department of Multimedia Engineering, Dongguk University, Seoul, Korea

## 1 Data set

### 1.1 Input

Organellar gene annotation is conducted as follows. We used the raw read file obtained from next-generation sequencing. NGS reads were used for preparation, sequencing, assembly, and annotation. Thus, AGORA requires only one assembled contig of nucleic acid in FASTA format. As shown in Figure S1, the user can select one FASTA formatted file that can be uploaded. As reference sequences, sequences of amino acids and nucleotides are required. In AGORA, the user-defined references or automatically generated references from NCBI can be uploaded. As shown in Figure S1, if users use the accession ID, then reference sequences are not required. In the FASTA file of the user-defined reference, RNA genes should contain trn in the description, as this key is used to generate a GenBank file. The available genome types for the organellar gene in the system are chloroplast and mitochondrion. The maximum matched sub gene count per each contig indicates the maximum BLAST matched count.

### 1.2 Output

Figure S2 is the screen capture of result page. The supported output files are eight types that include the OGDRAW figure. The top four rows of the result table show values for the user-defined options and the remaining outputs are supplementary outputs that can be downloaded. Users can download BLAST sequence alignments of both amino acids and nucleotides from the “Result” of the 8th row. Each query of amino acid gene identifies the most similar positions, where the count of similar positions depends on the maximum matched sub gene count option value. If “maximum matched sub gene count” is set to  $N$ , the number of matched BLAST results is less than  $N$ . Other supported files are amino acid and nucleotide database references. If a user-defined file is uploaded, these two files are identical to the uploaded files; however, if the user inserts the accession number, the references of amino acid and nucleotide are generated and displayed. Moreover, the system also provides files in FASTA format that are matched to the database and query of both the amino acid and nucleotide sequences. Separated files of FASTA format grouping by ②s shown in Figure 3(a) are supplied as results, and the nucleotide is also provided. Finally, the system provides the generated GenBank file based on the matched position and its visualization using OGDRAW tools.

---

<sup>\*</sup>gangman@dongguk.edu, (Corresponding author)

|                                | GeSeq          | CpGAVAS  | DOGMA          | AGORA   |
|--------------------------------|----------------|----------|----------------|---------|
| Support User define references | ✓              |          |                | ✓       |
| Support Chloroplast            | ✓              | ✓        | ✓              | ✓       |
| Support Mitochondrion          | △ <sup>a</sup> |          | △ <sup>a</sup> | ✓       |
| Provide BLAST Result           |                |          |                | ✓       |
| Provide file format            | GenBank        |          | GFF3           | GenBank |
| Provide MAP                    | OGDRAW         | GenomeVx | Linear         | OGDRAW  |

Table S1 : Specification comparison of four different systems.  
<sup>a</sup> △ stands for not supporting completely.

## 2 Analysis of results

Table S2 is the comparison analysis of different applications using representative species. On the third column, PL stands for chloroplast and MT is mitochondrion. The fourth column shows the original gene count from the NCBI GenBank file. From the fifth to eighth column, we show the number of genes from four different applications. AGORA found exactly the same number of original genes, but GeSeq resulted in more genes. The reason of different number between AGORA and GeSeq is the fragment of genes. In order to analyze the GenBank file, OGDRAW is employed since this tool is used to draw the circular map by the GenBank file. As Table S3 is displayed, three different OGDRAW images can be compared. The data is randomly selected from the Table S2. However, CpGAVAS does not provide the mitochondrion, so N/A is represented in the table. DOGMA does not provide as many genes as AGORA and GeSeq either.

The screenshot displays the AGORA web application interface. At the top, there is a navigation bar with the AGORA logo and links for LOGIN and REGISTER. Below this is a sub-header: "Annotator for Genome of Organelle from Referenced sequence Analysis". A secondary navigation bar contains links for Application, Introduction, Document, Sample Example, Reference, and Contact.

The main content area is divided into several sections:

- Reference sequences:** This section contains a dropdown menu with the instruction "Enter NCBI accession ID or upload the user-defined referenced sequences". Below this, the "Accession ID" field is populated with "NC\_026851". There is also an "OR - Please select CDS and RNA file" section with two "Browse ..." buttons for "Select CDS File" and "Select RNA File".
- Genome Type:** This section has two radio buttons: "Chloroplast" (which is selected) and "Mitochondrion".
- Genetic Code:** This section features a dropdown menu currently set to "Standard".
- Maximum matched sub gene's count per each contig:** This section has a text input field containing the value "1".
- Query Input Sequence:** This section includes a "Select File" label and a "Browse ..." button.

At the bottom of the form, there are two buttons: a blue "Submit" button and a green "Click here to put Sample Data" button.

Figure S1 : Screen capture of user-defined option values.

## AGORA - Result

Annotator for Genome of Organelle from Referenced sequence Analysis

| -- Result --                     | -- Data --                                                                                                                                                                                                                                                                                                                                                                                                                                                                                                                                                  |
|----------------------------------|-------------------------------------------------------------------------------------------------------------------------------------------------------------------------------------------------------------------------------------------------------------------------------------------------------------------------------------------------------------------------------------------------------------------------------------------------------------------------------------------------------------------------------------------------------------|
| Result URL                       | <a href="https://bigdata.dongguk.edu/gene_project/AGORA/">https://bigdata.dongguk.edu/gene_project/AGORA/</a>                                                                                                                                                                                                                                                                                                                                                                                                                                               |
| Reference accession ID           | NC_026851                                                                                                                                                                                                                                                                                                                                                                                                                                                                                                                                                   |
| Input Sequence                   | SpetPt.fasta                                                                                                                                                                                                                                                                                                                                                                                                                                                                                                                                                |
| Genetic code                     | Standard                                                                                                                                                                                                                                                                                                                                                                                                                                                                                                                                                    |
| Maximum matched sub gene's count | 1                                                                                                                                                                                                                                                                                                                                                                                                                                                                                                                                                           |
| Genome type                      | Chloroplast                                                                                                                                                                                                                                                                                                                                                                                                                                                                                                                                                 |
| Sequence alignments              | <a href="#">BLAST Result</a> ①                                                                                                                                                                                                                                                                                                                                                                                                                                                                                                                              |
| Output CSV file                  | <a href="#">Output CSV file</a> ②                                                                                                                                                                                                                                                                                                                                                                                                                                                                                                                           |
| Amino acid DB sequences          | <a href="#">Amino acid DB sequences</a> ③                                                                                                                                                                                                                                                                                                                                                                                                                                                                                                                   |
| Amino acid sequences             | <a href="#">Amino acid sequences</a> ④                                                                                                                                                                                                                                                                                                                                                                                                                                                                                                                      |
| Nucleotide DB sequences          | <a href="#">Nucleotide DB sequences</a> ⑤                                                                                                                                                                                                                                                                                                                                                                                                                                                                                                                   |
| Nucleotide sequences             | <a href="#">Nucleotide sequences</a> ⑥                                                                                                                                                                                                                                                                                                                                                                                                                                                                                                                      |
| GenBank file                     | <a href="#">GenBank file</a> ⑦                                                                                                                                                                                                                                                                                                                                                                                                                                                                                                                              |
| OGDRAW                           | <a href="#">Download PDF file</a>                                                                                                                                                                                                                                                                                                                                                                                                                                                                                                                           |
|                                  | 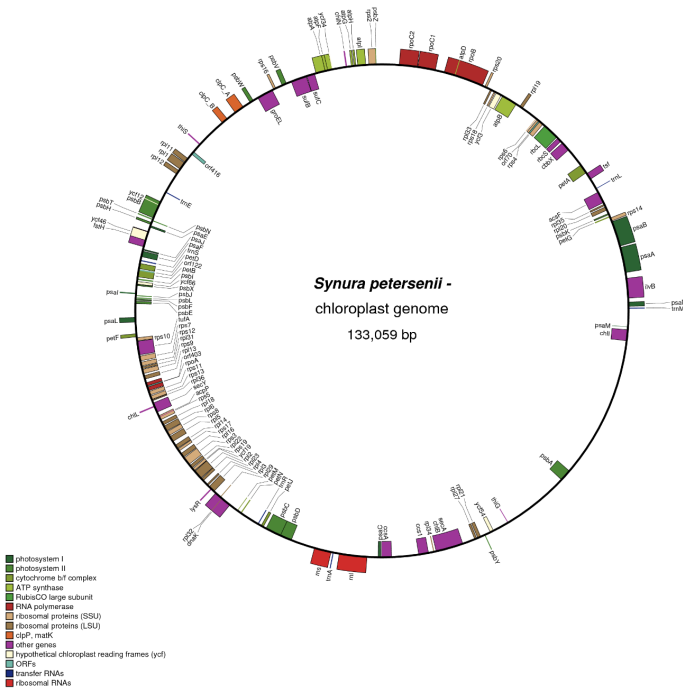 <p><i>Synura petersenii</i> - chloroplast genome<br/>133,059 bp</p> <ul style="list-style-type: none"> <li>photosystem I</li> <li>photosystem II</li> <li>cytochrome b6 complex</li> <li>ATP synthase</li> <li>Rubisco large subunit</li> <li>RNA polymerase</li> <li>ribosomal proteins (SSU)</li> <li>ribosomal proteins (LSU)</li> <li>ctp, matK</li> <li>other genes</li> <li>hypothetical chloroplast reading frames (orf)</li> <li>tRNA</li> <li>rRNA</li> </ul> |
| Download Result zip file         | <a href="#">Zipped output file</a>                                                                                                                                                                                                                                                                                                                                                                                                                                                                                                                          |

Figure S2 : Screen capture of the AGORA output page. Supplementary files such as BLAST result, matched position file, and GenBank file are provided. ① can be downloaded as BLAST results, with the screen capture shown in Figure S3(a). ② is linked to the separated position file, which includes the start position, end position, direction and product name of each gene. Please refer to Figure S3(b). ③ and ⑤ are sequences of the original reference amino acid and nucleotide. ④ and ⑥ are sets of aligned sequences, of which the screen is shown in Figure S3(a). ⑦ is the GenBank format file shown in Figure S3(c).

Query = I0[NC\_026851.1\_prot\_VP\_009131242.1 (gene=psaI) [locus\_tag=YB88\_gp001] [db\_xref=GeneID:24121340] (protein=photosystem I reaction center subunit IV) [protein\_id=VP\_009131242.1] [location=complement(53..259)] [gbkey=CDS]

0 MVDKKGSKVRILKESYWKDTSVYVVDQSKVLPVLRNKNVNSGTNTNNFNDEVEVSSOK ①

DB = SpdB

0 ATTAATTCGCTAAGAGAAATTATTGTATTAGTTCACATATAACAGAAATCAATCTAATCTACACGTGATCGATTGTTTCAGATTTCAT ②  
1 ACATCTACACAGTCTCTCTATTAAACAGTAAGATCTGCTCTAAATTCGACTTCGATCTTTTAA  
-Pos = (59030,59206), Len = 177, Score = 74.7 bits (182), Expect = 4e-20, Method: Compositional matrix adjust.  
Identities = 36/58 (62%), Positives = 47/58 (81%), Gaps = 1/58 (2%), Frame = -3

Query 4 IKKGSVKRLKESYWKDTSVYVVDQSKVLPVLRNKNVNSGTNTNNFNDEVEV 60  
Sbjct 59206 LKKGSVKRLKESYWKDTSVYVVDQSKVLPVLRNKNVNSGTNTNNFNDEVEV 59033

DB = SpdB

0 AATAAATTAGATAAAAAATACGAAGAAAGGAAGAAATATTGANGCAATAAATGGGAAATTCAGCCTGATTAATTCACAGATAATCATTT ②  
1 TCTTTGCTCAAAAGGTTTTTCT  
-Pos = (74861,74986), Len = 126, Score = 20.0 bits (40), Expect = 1.1, Method: Compositional matrix adjust.  
Identities = 10/42 (24%), Positives = 23/42 (55%), Gaps = 1/42 (2%), Frame = -3

Query 14 IKKGSVKRLKESYWKDTSVYVVDQSKVLPVLRNKNVNSGTNTNNFNDEVEV 55  
Sbjct 74986 LKKGSVKRLKESYWKDTSVYVVDQSKVLPVLRNKNVNSGTNTNNFNDEVEV 74864

#### (a) BLAST example of amino acid

start position, end position, direction (+/-), gene name, gene product  
59030,59206,-,psaE,YB88\_gp001  
/translation="LKKGSKVRILRTESYWFNKGVTVSVSEKSETIRYPVVRFDVSNVSGTNTNNFSLAEL  
74861,74986,-,psaE,YB88\_gp001  
/translation="RKKPFEEKENGLSVKFNQAGI-FPIIASNILPFLSYFLSNF  
59591,60964,+,fstH,YB88\_gp002  
/translation="FGEFTALD-----PNIVQVITDKVTFNDVAGNEEKEELKEVIRFLTPDQFGKLGA  
TVPKGVLGGPPGTGKTLAKAVAGEAGVPFLKVSQSQFVELLVGGAARVRELFDKARA  
LQPSIIFIDEIDSIARARSTNSSMGGGNDEREQTLNQILTEMDGFEVSSGIVVMAASNRI  
DILDPAIKRAGFRDQITINPNLKERQELKVHARGKLLDTSVSLMMIAQRTIGFSGAD  
LENVLEAAIATLRKRPITITMNEIGLSIDRLVIGLEGKLLRVKSRQLTAFHEMGHAF  
GSLINEEDGIEKLTLPVPRGETQGTWTIPASQYNSRNIFLNQILVSGGAAEEIVNGK  
SEYTVGAQMDELITRTVRFMVLRYAMTRL-----QELKQEAQLRNLFYLGSDVKKELN  
NIIDNFTTNFMDITYNEIVAFRLRIRPGGE---RIVDQLLISELTGKDLRTI  
15507,15914,-,fstH,YB88\_gp002  
/translation="LLNKTDSIDIRDCYVKTG-IEKILST---LDSELVGLKNVKTREISSVLLFDRIEIQ  
ELGALNSSLHMSFTGRPGTKGTSVANKIALVRLNLGYLTGHLTNVTREDLVGQYVGHTA  
PKTREQLKRAQGG---ILFIDE  
53709,54086,+,rpl12,YB88\_gp138  
/translation="ITNIEELKSLTLEASELVTEIEKFVGDVTSISVNSAVSLVPQAVVEAV--EEKTQF  
DVILDSVPADKIAILKIVRNVTGLGLKESKEIVDNVPKVLKEGISKESETIKIEIETA  
GGKIILK  
52897,53565,+,rpl1,YB88\_gp137  
/translation="RFQNLKQLVTKETYSLEEGIPLLKNLATAKFIESVEAHVSLNIDPKYANQQLRTSLVLPN  
GTGNSIRIAVFTEADYVEEILKSGATAGSDDLIEDITNGKLNFDLITTPQLMPLKAKL  
GRVLGPKGLMPSPKSGTVTQNLKEAIESEKKGKLEYRADKTGIVHLNFGKVSFSEIQLKE  
NLIAVYNSLEKNKPSGVRGRYKFSNICTTMSPAINLELTTF  
107122,107214,-,rpl1,YB88\_gp137  
/translation="KRFKIVNKFEKILRKFKILNIFNPFNSNS  
52420,52842,+,rpl11,YB88\_gp136  
/translation="MAKKIKAFVKLALPAGKATPAPPVGPALGQHGWNIAAFCKEYNAKTAEKIGLIIPVKITI  
YEDRSYSILKSPASVLLAKFANVKKGSSQPNKEIVGNVTLEQVKIEATIKMNDLNTNN  
MEKAILIIGKTAKSMGIKIE

#### (b) The result of position file

gene complement(59030..59206)  
/gene="psaE"  
CDS complement(59030..59206)  
/gene="psaE"  
/product="YB88\_gp001"  
/translation="LKKGSKVRILRTESYWFNKGVTVSVSEKSETIRYPVVRFDVSNVSGTNTNNFSLAEL"  
gene complement(74861..74986)  
/gene="psaE"  
CDS complement(74861..74986)  
/gene="psaE"  
/product="YB88\_gp001"  
/translation="RKKPFEEKENGLSVKFNQAGI-FPIIASNILPFLSYFLSNF"  
59591..60964  
/gene="fstH"  
CDS 59591..60964  
/gene="fstH"  
/product="YB88\_gp002"  
/translation="FGEFTALD-----PNIVQVITDKVTFNDVAGNEEKEELKEVIRFLTPDQFGKLGA  
TVPKGVLGGPPGTGKTLAKAVAGEAGVPFLKVSQSQFVELLVGGAARVRELFDKARA  
LQPSIIFIDEIDSIARARSTNSSMGGGNDEREQTLNQILTEMDGFEVSSGIVVMAASNRI  
DILDPAIKRAGFRDQITINPNLKERQELKVHARGKLLDTSVSLMMIAQRTIGFSGAD  
LENVLEAAIATLRKRPITITMNEIGLSIDRLVIGLEGKLLRVKSRQLTAFHEMGHAF  
GSLINEEDGIEKLTLPVPRGETQGTWTIPASQYNSRNIFLNQILVSGGAAEEIVNGK  
SEYTVGAQMDELITRTVRFMVLRYAMTRL-----QELKQEAQLRNLFYLGSDVKKELN  
NIIDNFTTNFMDITYNEIVAFRLRIRPGGE---RIVDQLLISELTGKDLRTI"  
gene 93931..95396  
/gene="rns"  
rRNA 93931..95396  
/gene="rns"  
/product="ribosomal RNA"  
gene 125005..123540  
/gene="rns"  
rRNA 125005..123540  
/gene="rns"  
/product="ribosomal RNA"  
gene 95555..95627  
/gene="trnA"  
tRNA 95555..95627  
/gene="trnA"  
/product="trnA"

#### (c) The results of GenBank format

Figure S3 : Screen capture of three representative results. Figure S3(a) is one of BLAST examples when users set 2 as the “Maximum matched sub gene’s count per each contig” at the input option. The query and database for running BLAST are reversed, when the best matched position of the targeted genes is identified. ① in Figure S3(a) is an example of the amino acid result. ② in Figure S3(a) will be used to generate the output of “Amino acid sequences” at shown in Figure S2 ④. Figure S3(b) is the csv file that represents the direction and position of the genes. Figure S3(c) is the input file of OGDRAW showing the final results.

|                     | Species                  | NCBI<br>RefSeq | Genome<br>Type | Genes<br>Count | AGORA | GeSeq | CpGAVAS | DOGMA |
|---------------------|--------------------------|----------------|----------------|----------------|-------|-------|---------|-------|
| Viridiplantae       | Arabidopsis thaliana     | NC_000932      | PL             | 129            | 129   | 142   | 139     | 155   |
|                     |                          | NC_001284      | MT             | 131            | 141   | 208   | 39      | 4     |
| Green algae         | Chlorella variabilis     | NC_015359      | PL             | 115            | 115   | 120   | 107     | 115   |
|                     |                          | NC_025413      | MT             | 62             | 62    | 73    | 28      | 3     |
| Rhodophyta          | Gracilaria chorda        | NC_031149      | PL             | 233            | 233   | 250   | N/A     | 220   |
|                     |                          | NC_023251      | MT             | 51             | 51    | 51    | N/A     | 3     |
| Phaeophyceae        | Ectocarpus siliculosus   | NC_013498      | PL             | 185            | 185   | 212   | 160     | 115   |
|                     |                          | NC_030223      | MT             | 68             | 68    | 68    | 25      | 2     |
| Anoebozoa           | Acanthamoeba castellanii | NC_001637      | MT             | 57             | 57    | 57    | N/A     | 1     |
| Opithokonta (Fungi) | Saccharomyces cerevisiae | NC_027264      | MT             | 35             | 34    | 39    | N/A     | 15    |
| Human               | Homo sapiens             | NC_012920      | MT             | 37             | 37    | 37    | N/A     | 15    |
| Beetles (Hoeny bee) | Apis mellifera           | NC_001566      | MT             | 13             | 29    | 37    | N/A     | 15    |
| Mouse               | Mus musculus (C57BL/6J)  | NC_005089      | MT             | 37             | 37    | 37    | N/A     | 15    |
| Fish (Zebra)        | Danio rerio              | NC_002333      | MT             | 37             | 37    | 37    | N/A     | 15    |

Table S2 : Comparison analysis of different applications using representative species. At the genome type, PL indicates chloroplast and MT is mitochondria. The genes count is the number of genes for the NCBI reference.

| Accession Number | Genome Type | GenBank                                                                             | GeSeq                                                                                | AGORA                                                                                |
|------------------|-------------|-------------------------------------------------------------------------------------|--------------------------------------------------------------------------------------|--------------------------------------------------------------------------------------|
| NC_013498        | PL          | 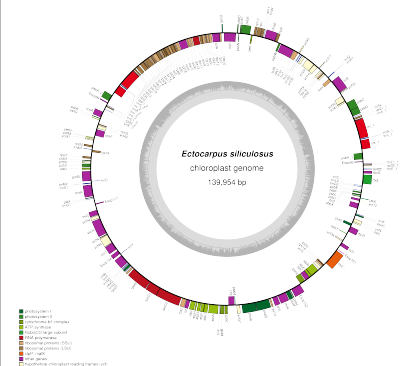  | 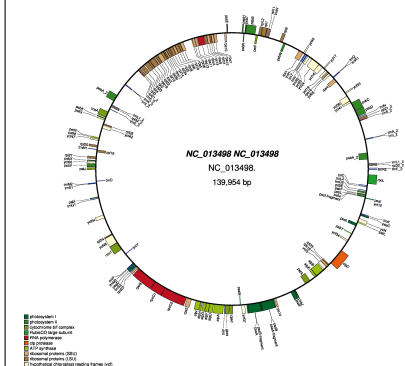  | 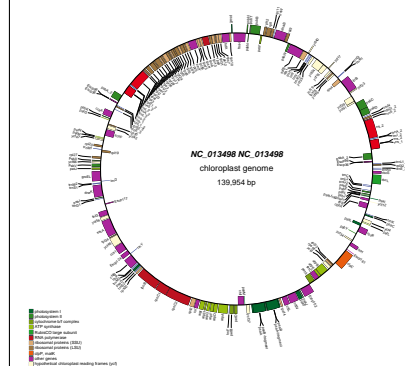  |
| NC_002333        | MT          | 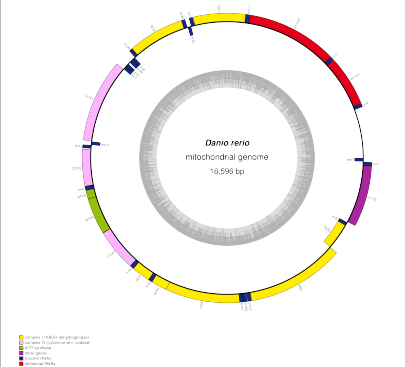 | 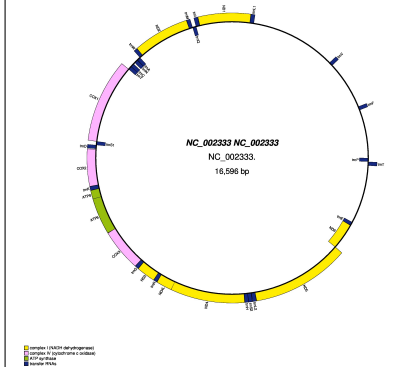 | 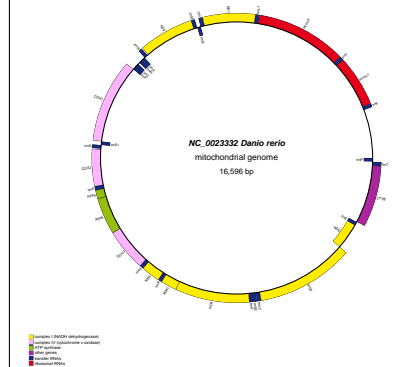 |

Table S3 : Comparison analysis of OGDRAW. The third column is drawn from the original Genbank file, the fourth column is the image of GeSeq image and fifth column is drawn by AGORA.
